# Supplementary material
Source: PubMed Central journal article supplement (PMC6431566)
Supplement: NIHMS1521184-supplement-4.pdf [file NIHMS1521184-supplement-4.pdf]

**Table S2. Parameter values of healthy subjects and CKD patients**

| Healthy Adults |        |     |                | CKD Patients† |        |     |                |      |     |            |              |
|----------------|--------|-----|----------------|---------------|--------|-----|----------------|------|-----|------------|--------------|
| No.            | Gender | Age | AOPPs (μmol/L) | No.           | Gender | Age | AOPPs (μmol/L) | Scr  | GFR | UACR (g/g) | Wnt1 (ng/ml) |
| 1              | M      | 52  | 74.4097        | 1             | F      | 48  | 204.4979       | 703  | 5   | 5.8611     | 7.7297       |
| 2              | F      | 36  | 41.9305        | 2             | F      | 33  | 162.0762       | 69   | 100 | 6.8598     | 7.0859       |
| 3              | M      | 38  | 60.4900        | 3             | M      | 43  | 156.7734       | 433  | 13  | 0.3761     | 5.2016       |
| 4              | F      | 38  | 65.7928        | 4             | F      | 35  | 261.5022       | 655  | 6   | 2.2567     | 6.1435       |
| 5              | M      | 45  | 88.9922        | 5             | M      | 55  | 180.6357       | 160  | 41  | 3.8354     | 6.0688       |
| 6              | F      | 45  | 58.5015        | 6             | F      | 61  | 193.8925       | 162  | 29  | 5.4121     | 5.8190       |
| 7              | F      | 32  | 73.0840        | 7             | M      | 17  | 187.2641       | 150  | 58  | 5.0775     | 5.5333       |
| 8              | M      | 42  | 75.7354        | 8             | M      | 49  | 120.9801       | 1218 | 4   | 0.7964     | 5.7468       |
| 9              | M      | 45  | 69.7698        | 9             | M      | 68  | 220.4061       | 678  | 7   | 4.6689     | 6.0390       |
| 10             | F      | 32  | 65.7928        | 10            | M      | 32  | 131.5855       | 153  | 51  | 0.0578     | 5.6626       |
| 11             | M      | 45  | 94.9577        | 11            | M      | 42  | 253.5481       | 771  | 7   | 0.2906     | 5.9357       |
| 12             | F      | 42  | 44.5819        | 12            | M      | 40  | 298.6212       | 682  | 8   | 0.4039     | 6.2642       |
| 13             | F      | 42  | 49.8846        | 13            | M      | 31  | 175.3330       | 93   | 94  | 2.2522     | 6.1285       |
| 14             | F      | 40  | 98.2719        | 14            | F      | 30  | 91.8151        | 73   | 95  | 0.0021     | 5.7900       |
| 15             | F      | 35  | 51.8731        | 15            | M      | 19  | 183.2870       | 90   | 106 | 3.7375     | 7.0859       |
| 16             | F      | 42  | 60.4900        | 16            | F      | 67  | 163.4018       | 112  | 44  | 1.3569     | 6.0837       |
| 17             | M      | 30  | 54.5245        | 17            | M      | 20  | 159.4248       | 137  | 63  | 0.4479     | 5.4492       |
| 18             | M      | 30  | 57.8387        | 18            | F      | 52  | 163.4018       | 296  | 15  | 0.4403     | 5.8918       |
| 19             | F      | 33  | 55.1873        | 19            | M      | 54  | 168.7046       | 604  | 8   | 1.3092     | 5.3936       |
| 20             | F      | 40  | 58.5015        | 20            | M      | 62  | 181.9614       | 102  | 68  | 3.0478     | 5.9357       |
| 21             | M      | 38  | 73.0840        | 21            | M      | 52  | 143.5166       | 79   | 98  | 1.6710     | 5.7468       |
| 22             | F      | 39  | 73.7468        | 22            | M      | 47  | 160.7505       | 526  | 10  | 4.0321     | 5.9946       |
|                |        |     |                | 23            | F      | 26  | 171.3559       | 53   | 126 | 6.2741     | 7.7471       |
|                |        |     |                | 24            | M      | 46  | 135.5626       | 423  | 14  | 0.8594     | 6.3098       |
|                |        |     |                | 25            | F      | 59  | 183.2870       | 691  | 5   | 0.7663     | 5.9799       |
|                |        |     |                | 26            | F      | 41  | 233.6629       | 323  | 15  | 3.4138     | 5.7468       |
|                |        |     |                | 27            | M      | 53  | 180.6357       | 357  | 16  | 0.1994     | 5.5615       |
|                |        |     |                | 28            | M      | 63  | 212.4520       | 589  | 8   | 2.6172     | 5.8918       |
|                |        |     |                | 29            | F      | 20  | 172.6816       | 76   | 97  | 0.5349     | 5.6608       |
|                |        |     |                | 30            | F      | 26  | 99.7692        | 49   | 129 | 0.0055     | 6.1435       |
|                |        |     |                | 31            | M      | 54  | 154.1221       | 637  | 8   | 1.8199     | 5.7756       |
|                |        |     |                | 32            | M      | 64  | 117.0030       | 245  | 23  | 0.0020     | 5.3383       |
|                |        |     |                | 33            | F      | 28  | 223.0574       | 146  | 42  | 2.0051     | 6.3557       |
|                |        |     |                | 34            | M      | 26  | 147.4937       | 68   | 125 | 2.8801     | 6.1886       |
|                |        |     |                | 35            | M      | 17  | 171.3559       | 81   | 122 | 4.7321     | 6.6985       |
|                |        |     |                | 36            | F      | 26  | 86.5124        | 57   | 123 | 0.0036     | 5.5474       |
|                |        |     |                | 37            | F      | 31  | 188.5898       | 724  | 6   | 1.9641     | 5.9064       |
|                |        |     |                | 38            | F      | 23  | 147.4937       | 51   | 130 | 3.5051     | 6.0539       |
|                |        |     |                | 39            | M      | 46  | 134.2369       | 377  | 16  | 3.0937     | 5.7756       |
|                |        |     |                | 40            | M      | 18  | 254.8738       | 136  | 65  | 7.5250     | 5.8480       |
|                |        |     |                | 41            | M      | 63  | 199.1952       | 73   | 94  | 3.2236     | 5.5615       |
|                |        |     |                | 42            | F      | 25  | 264.1535       | 571  | 8   | 1.5093     | 5.7324       |
|                |        |     |                | 43            | M      | 57  | 147.4937       | 146  | 45  | 0.0320     | 5.6039       |
|                |        |     |                | 44            | M      | 33  | 179.3100       | 248  | 28  | 1.5188     | 5.5192       |
|                |        |     |                | 45            | F      | 37  | 139.5396       | 114  | 53  | 0.7955     | 6.1735       |
|                |        |     |                | 46            | F      | 34  | 168.7046       | 682  | 6   | 0.5002     | 5.8626       |
|                |        |     |                | 47            | M      | 62  | 195.2182       | 987  | 4   | 3.2446     | 5.6465       |
|                |        |     |                | 48            | F      | 44  | 143.5166       | 60   | 106 | 0.0123     | 5.7900       |
|                |        |     |                | 49            | M      | 68  | 151.4707       | 246  | 22  | 3.2609     | 5.6181       |
|                |        |     |                | 50            | F      | 54  | 241.6170       | 65   | 92  | 8.5209     | 6.0539       |
|                |        |     |                | 51            | M      | 63  | 155.4478       | 176  | 35  | 0.1988     | 5.7756       |
|                |        |     |                | 52            | F      | 49  | 135.5626       | 74   | 82  | 0.0017     | 5.7756       |
|                |        |     |                | 53            | F      | 45  | 151.4707       | 109  | 53  | 0.8836     | 5.5474       |
|                |        |     |                | 54            | M      | 55  | 172.6816       | 144  | 47  | 2.0367     | 5.9651       |
|                |        |     |                | 55            | F      | 40  | 143.5166       | 63   | 107 | 1.2822     | 5.0535       |
|                |        |     |                | 56            | F      | 29  | 131.5855       | 68   | 104 | 0.4748     | 5.8045       |

|    |   |    |          |      |     |        |        |
|----|---|----|----------|------|-----|--------|--------|
| 57 | F | 20 | 208.4750 | 955  | 5   | 1.0449 | 5.6751 |
| 58 | M | 44 | 227.0345 | 72   | 108 | 3.1785 | 5.7324 |
| 59 | M | 40 | 103.7462 | 58   | 121 | 0.0204 | 5.3936 |
| 60 | M | 22 | 163.4018 | 110  | 82  | 0.0964 | 6.0986 |
| 61 | M | 59 | 163.4018 | 135  | 49  | 0.8830 | 6.4172 |
| 62 | M | 65 | 175.3330 | 101  | 67  | 0.5844 | 6.4945 |
| 63 | F | 69 | 179.3100 | 114  | 42  | 0.6797 | 7.4200 |
| 64 | M | 62 | 187.2641 | 210  | 28  | 0.4996 | 5.9504 |
| 65 | F | 21 | 244.2683 | 374  | 14  | 0.9631 | 5.8772 |
| 66 | F | 65 | 221.7318 | 385  | 10  | 0.4690 | 5.8626 |
| 67 | F | 63 | 329.1118 | 245  | 17  | 2.7138 | 5.8626 |
| 68 | F | 62 | 143.5166 | 644  | 5   | 0.3570 | 5.6181 |
| 69 | M | 64 | 185.9384 | 725  | 6   | 0.1265 | 5.3521 |
| 70 | F | 65 | 264.1535 | 630  | 5   | 0.6720 | 5.3108 |
| 71 | F | 37 | 118.1571 | 56   | 115 | 0.0077 | 5.8190 |
| 72 | M | 30 | 94.2949  | 100  | 87  | 0.0014 | 5.8918 |
| 73 | M | 32 | 140.6937 | 74   | 116 | 0.0046 | 5.5052 |
| 74 | F | 26 | 124.4411 | 50   | 128 | 0.0014 | 5.7324 |
| 75 | F | 41 | 112.1916 | 53   | 113 | 0.0024 | 5.6181 |
| 76 | M | 30 | 145.9964 | 50   | 138 | 0.1671 | 5.4772 |
| 77 | F | 38 | 126.5444 | 52   | 116 | 0.0785 | 6.0094 |
| 78 | F | 27 | 128.0997 | 52   | 126 | 0.5462 | 5.8626 |
| 79 | F | 34 | 102.2490 | 45   | 125 | 0.0035 | 5.4912 |
| 80 | F | 45 | 205.6520 | 69   | 92  | 2.6014 | 6.0242 |
| 81 | M | 30 | 284.3458 | 128  | 64  | 0.4099 | 6.1585 |
| 82 | M | 43 | 245.6615 | 113  | 68  | 2.7027 | 5.8335 |
| 83 | M | 34 | 256.6025 | 102  | 83  | 0.0454 | 6.2036 |
| 84 | M | 43 | 240.5818 | 103  | 74  | 0.4570 | 5.7900 |
| 85 | M | 47 | 185.8768 | 92   | 85  | 0.2091 | 5.6894 |
| 86 | F | 49 | 191.7380 | 79   | 75  | 0.2312 | 5.7612 |
| 87 | M | 45 | 180.0155 | 92   | 86  | 0.0381 | 5.7612 |
| 88 | F | 33 | 272.2325 | 463  | 10  | 0.8421 | 6.7143 |
| 89 | F | 51 | 334.7525 | 316  | 14  | 1.4018 | 6.5101 |
| 90 | M | 48 | 218.3090 | 357  | 16  | 0.3341 | 6.4480 |
| 91 | M | 46 | 517.2328 | 1033 | 5   | 3.5762 | 7.4370 |
| 92 | M | 49 | 440.6458 | 639  | 8   | 3.5857 | 7.0695 |
| 93 | M | 39 | 254.2580 | 519  | 11  | 0.7020 | 6.6827 |
| 94 | F | 24 | 314.8243 | 1181 | 3   | 1.1605 | 6.6985 |

†Scr: Serum creatinine ( $\mu\text{mol/l}$ ); GFR: Glomerular filtration rate ( $\text{ml/min/1.73m}^2$ ); UACR: urine albumin-creatinine ratio ( $\text{g/g}$ ).
